# Supplementary material for: High-quality free-standing and oriented periodic mesoporous organosilica films grown without a solid substrate at the air–water interface
Source: Royal Society of Chemistry journal article supplement (doi:10.1039/b405905k), 2004-01-01
Supplement: b405905k.doc [file b405905k.doc]

**Electronic Supplementary Information**


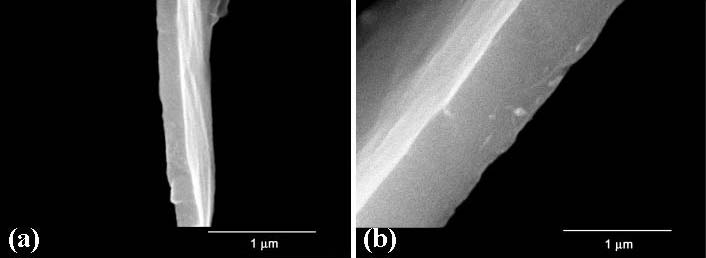


Fig. S1 SEM images of the magnified edge part of the as-synthesized PMO film grown at air-water interface at 95 oC for (a) 30 min and (b) 24 h (KEVEX Sigma microscope, operated at 20 kV).

Fig. S2 Nitrogen adsorption-desorption isotherms for surfactant-extracted PMO film (Micromeritics Instrument Corp., ASAP 2010). Inset shows the pore size distribution obtained using desorption branch by BJH method.


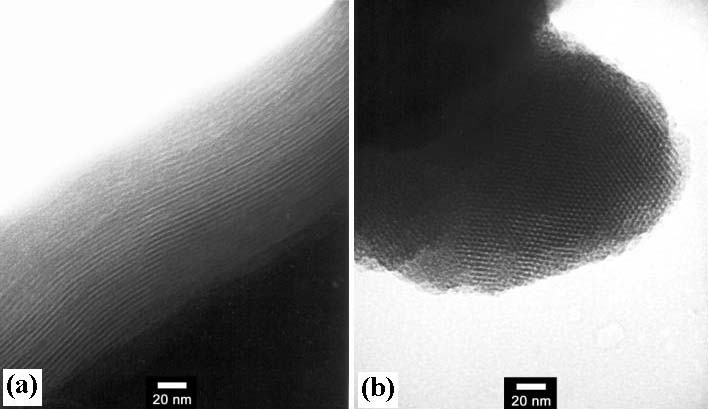


Fig. S3 TEM images of PMO film calcined at 400 oC for 2 h in N2 (JEOL JEM-2010 microscope, operated at 200 kV), showing (a) a highly ordered periodic structure consistent with a hexagonal close-packed arrangement of channels running parallel to the surface of the PMO film, and (b) hexagonal basal plane with a well-ordered hexagonal array.

**Fig. S4** (a) 29Si MAS NMR spectrum and (b) 13C cross-polarization (CP) MAS NMR spectrum of surfactant-extracted PMO film. The spectra were obtained on a Bruker DSX400 spectrometer at room temperature with a 4 mm zirconia rotor spinning at 6 kHz (Resonance frequencies of 79.5 MHz and 100.6 MHz for 29Si and 13C CP MAS NMR, respectively; 90o pulse width of 5 μs, contact time 2 ms, recycle delay 3 s for both 29Si and 13C CP MAS NMR)

Table S1. The relative yields of the bulk product PMO and the PMO film as a function of reaction times.

| Yield      Reaction time | Total Yield  (mol %) | Relative Yields (mol %) | |
| --- | --- | --- | --- |
| Bulk product PMO* | PMO film |
| 30 min | 34.6 | 98.8 | 1.2 |
| 8 h | 59.5 | 97.9 | 2.1 |
| 24 h | 70.0 | 97.3 | 2.7 |

* The bulk product PMO precipitated on the bottom of the PP bottle during the PMO synthesis.
